# Widespread lateral gene transfer among grasses

Samuel G. S. Hibdige<sup>1</sup>, Pauline Raimondeau<sup>1,2</sup>, Pascal-Antoine Christin<sup>1</sup>, Luke T. Dunning<sup>1\*</sup>

## Affiliations:

<sup>1</sup> Animal and Plant Sciences, University of Sheffield, Western Bank, Sheffield S10 2TN, United Kingdom

<sup>2</sup> Present address: Laboratoire Évolution & Diversité Biologique (EDB UMR5174), CNRS, Institut de Recherche pour le Développement, F-31062 Toulouse, France

**\*Corresponding author:** Luke T. Dunning; Animal and Plant Sciences, University of Sheffield, Western Bank, Sheffield S10 2TN, United Kingdom; +44 (0) 1142220027; [l.dunning@sheffield.ac.uk](mailto:l.dunning@sheffield.ac.uk)

## Word count:

Introduction = 860 words

Materials and Methods = 1,572 words

Results = 1,542 words

Discussion = 1,682 words

**Total = 5,656 words**

Number of figures: 4

Colour figures: 2 (Figure 1 and Figure 2)

Number of Tables: 3

Supporting information: Yes

26 **Summary**

27

28 • Lateral gene transfer (LGT) has been documented in a broad range of prokaryotes and  
29 eukaryotes, and it can promote adaptation. LGT of functional nuclear genes has been  
30 reported among some plants, but systematic studies are needed to assess the frequency and  
31 facilitators of LGT in the group.

32

33 • We scan the genomes of a diverse set of 17 grass species that span more than 50 million  
34 years of divergence and include major crops to identify grass-to-grass protein-coding LGT.

35

36 • We identify LGT in 13 species, with significant variation in the amount each received.  
37 Rhizomatous species acquired statistically more genes, probably because this growth habit  
38 boosts opportunities for transfer into the germline. In addition, the amount of LGT increases  
39 with phylogenetic relatedness, which might reflect genomic compatibility amongst close  
40 relatives facilitating successful transfers. However, genetic exchanges among highly  
41 divergent species with overlapping distributions also occur, pointing to an additional role of  
42 biogeography.

43

44 • Overall, we show that LGT is a widespread phenomenon in grasses, which has moved  
45 functional genes across the entire grass family into domesticated and wild species alike. The  
46 dynamics of successful LGT appears to be dependent on both opportunity (co-occurrence  
47 and rhizomes) and compatibility (phylogenetic distance).

48

49 **Keywords:** adaptation, evolution, genomics, horizontal gene transfer, phylogenomics, Poaceae.

## 50 **1. Introduction**

51 The adaptive potential of a species is limited by its evolutionary history, the amount of standing  
52 genetic variation and the rate of new mutations (Barrett & Schluter, 2008). Lateral gene transfer  
53 (LGT) enables organisms to overcome these limitations by exchanging genetic material between  
54 lineages that have evolved significant reproductive barriers (Doolittle, 1999). LGT is an important  
55 evolutionary force in prokaryotes, with up to 60% of genes within a species pan-genome being  
56 acquired in this manner (Freschi *et al.*, 2018). The genes transferred can have a dramatic effect on  
57 adaptation, facilitating the colonisation of new niches and the development of novel phenotypes, as  
58 exemplified by the rapid spread of antibiotic resistance in bacteria (Ochman *et al.*, 2000). While  
59 LGT is more prevalent in prokaryotes, it has also been documented in a variety of multicellular  
60 eukaryotes (reviewed in: Anderson, 2005; Keeling & Palmer, 2008; Schönknecht *et al.*, 2014;  
61 Husnik *et al.*, 2018; Van Etten & Bhattacharya, *in press*), including plants (reviewed in: Richardson  
62 & Palmer, 2007; Gao *et al.*, 2014; Wickell & Li, 2019).

63  
64 DNA has been transferred into plants from prokaryotes, fungi and viruses, with recipients in  
65 particular in algae (Cheng *et al.*, 2019) and bryophytes (Yue *et al.*, 2012; Maumus *et al.*, 2014;  
66 Bowman *et al.*, 2017; Zhang *et al.*, 2020). Concerning plant-to-plant transfers, a majority of nuclear  
67 LGT reported so far involve the transfer of genetic material between parasitic species and their  
68 hosts, with examples from the genera *Cuscuta* (Vogel *et al.*, 2018; Yang *et al.*, 2019), *Rafflesia* (Xi  
69 *et al.*, 2012), and *Striga* (Yoshida *et al.*, 2010). However, plant-to-plant LGT is not restricted to  
70 parasitic interactions, and it has been recorded in ferns (Li *et al.*, 2014) and eight different species  
71 of grass (Vallenback *et al.*, 2008; Christin *et al.*, 2012a; Prentice *et al.*, 2015; Mahelka *et al.*, 2017;  
72 Dunning *et al.*, 2019). Grasses represent one of the best systems to investigate factors promoting  
73 LGT between non-parasitic plants as they are the only group where multiple LGT recipients have  
74 been identified, and there is extensive genomic resources available due to their economic and

75 ecological importance (Chen *et al.*, 2018). Early examples of grass-to-grass LGT were largely  
76 obtained incidentally, and only one grass genome (*Alloteropsis semialata*) has been  
77 comprehensively scanned, with 59 LGTs identified using stringent phylogenetic filters (Dunning *et*  
78 *al.*, 2019). These 59 protein-coding genes were transferred from at least nine different donors as  
79 part of 23 large fragments of foreign DNA (up to 170 kb). A majority of the acquired LGTs within  
80 *A. semialata* are expressed, with functions associated with photosynthesis, disease resistance and  
81 abiotic stress tolerance (Dunning *et al.*, 2019; Phansopa *et al.*, *In press*). While reports of LGT in  
82 other species in the group suggest it is a widespread phenomenon, its full distribution within the  
83 family remains to be assessed.

84

85 Grasses are very diverse (Soreng *et al.*, 2015), with more than 12,000 species exhibiting extensive  
86 phenotypic variation that may influence LGT dynamics. In particular, the family contains both  
87 annuals and perennials. If LGT happens during vegetative growth (e.g. root-to-root inosculation),  
88 the number of LGT is predicted to be higher in perennial and rhizomatous species. Conversely, if  
89 LGT happens through illegitimate pollination, the number of LGT may not vary with growth form  
90 or be higher in annuals that produce seeds more frequently. Finally, successful transfers might be  
91 more likely to occur between closely-related groups with similar genome features as observed in  
92 prokaryotes (Skippington & Ragan, 2012; Soucy *et al.*, 2015). Most of the grass diversity is  
93 clustered in the two BOP and PACMAD sister groups that diverged more than 50 million years ago  
94 (Christin *et al.*, 2014). Each of the two groups has more than 5,000 taxa and includes model species  
95 with complete genomes (Soreng *et al.*, 2015). The family therefore offers unparalleled opportunities  
96 to determine whether functional characteristics or phylogenetic distance determine the amount of  
97 LGT among non-parasitic plants.

98

99 In this study, we use a phylogenomic approach to scan 17 different grass genomes and quantify

100 LGT among them. The sampled species belong to five different clades of grasses, two from the  
101 BOP clade (Oryzoideae and Pooideae) and three from the PACMAD clade (Andropogoneae,  
102 Chloridoideae, and Paniceae). Together, these five groups contain more than 8,000 species or over  
103 70% of the diversity within the whole family (Soreng *et al.*, 2015). In our sampling, each of these  
104 five groups is represented by at least two divergent species, allowing us to monitor the number of  
105 transfers among each group. In addition, the species represent a variety of domestication statuses,  
106 life-history strategies, genome sizes, and ploidy levels (Table 1). Using this sampling design, we (i)  
107 test whether LGT is more common in certain phylogenetic lineages, and (ii) test whether some plant  
108 characters are associated with a statistical increase of LGT. We then focus on the donors of the LGT  
109 received by the Paniceae tribe, a group for which seven genomes are available, to (iii) test whether  
110 the number of LGT increases with phylogenetic relatedness. Our work represents the first  
111 systematic quantification of LGT among members of a large group of plants and sheds new light on  
112 the conditions that promote genetic exchanges across species boundaries in plants.

113

114

115

116

117

118

119

120

121

122

123

124

## 125 2. Materials and Methods

### 126 2.1 Detecting grass-to-grass LGT

127 We modified the approach previously used by Dunning *et al.*, (2019) to identify grass-to-grass LGT.  
128 Specifically, we did not use the initial mapping filtering step from Dunning *et al.* as it relied on the  
129 availability of high-coverage genome data for pairs of closely related species. In total, 17 genomes  
130 were scanned for LGT (Table 1), with all phylogenetic analyses based on coding sequences (total =  
131 817,621 genes; mean per species 48,095 genes; SD = 26,764 genes).

132

133 In the first step, 37-taxa trees were constructed using data from the 17 grass genomes (Table 1),  
134 supplemented with transcriptome data for 20 additional species from across the grass family  
135 (Moreno-Villena *et al.*, 2018; Table S1). BLASTn was used to identify the top-match for each gene  
136 in the 36 other species with a minimum match length of 300bp (not necessarily a single continuous  
137 BLAST match). Nucleotide alignments were generated by aligning the BLASTn matching regions  
138 to the query sequence using the 'add fragments' parameter in MAAFT v7.427 (Katoh & Standley,  
139 2013). If the BLASTn match for a species was fragmented, the different fragments were joined into  
140 a single sequence after they had been aligned. Alignments with less than ten species were  
141 considered non informative and consequently discarded (retained 55.9% of genes; total = 457,003  
142 genes; mean per species 26,883 genes; SD = 13,042 genes; Table S2). For each alignment with ten  
143 species or more, a maximum-likelihood phylogenetic tree was inferred using PhyML v.20120412  
144 (Guindon & Gascuel, 2003) with the GTR+G+I substitution model. Each topology was then mid-  
145 point rooted using the phytools package in R and perl scripts were used to identify genes from each  
146 focus species nested within a different group of grasses. We focused on five groups  
147 (Andropogoneae, Chloridoideae, Oryzoideae, Paniceae and Pooideae) represented by at least two  
148 complete genomes that were supported by most gene trees in a previous multigene coalescent  
149 species tree analysis (Figure 1; Dunning *et al.*, 2019). The whole set of analyses were later repeated

150 to detect LGT between well supported subclades within the Paniceae, considering LGT received  
151 from two clades represented by two genomes and supported by most gene trees in previous analyses  
152 (i.e. Cenchrinae and Panicinae, Figure 1). To be considered as nested, the sister species of the query  
153 gene, and their combined sister group, had to belong to the same grass group to which the query  
154 gene does not belong. For genes that were nested, the analysis was repeated with 100 bootstrap  
155 replicates to verify that the nesting of the query sequence was supported by a minimum of 50% of  
156 the bootstrap replicates.

157

158 The second filtering step was applied to those candidates that passed the first phylogenetic filter.  
159 For those, we performed a second round of filtering using data from 105 genome/transcriptome  
160 datasets belonging to 85 species, including the datasets used for the 37-taxa trees (Table S1). For  
161 each LGT candidate, we used BLASTn to identify all matches (not just the best match) with a  
162 minimum alignment length of 300bp (not necessarily a single continuous blast match) in each of the  
163 105 datasets. Alignments were generated as previously, before being re-aligned as codons using  
164 MAAFT and manually trimmed with a codon-preserving method to remove poorly aligned regions.  
165 Maximum likelihood phylogenies were then inferred using PhyML v.21031022, with the best  
166 substitution model identified by Smart Model Selection SMS v.1.8.1 (Lefort *et al.*, 2017). The trees  
167 were manually inspected and discarded if: i) there were less than three species within or outside the  
168 LGT donor clade; ii) the LGT candidate was not nested within another group of grasses with the  
169 increased taxon sampling; or iii) the tree had obvious paralogy problems due to gene duplication  
170 events. For retained candidates, we removed paralogs representing duplicates originating before the  
171 core grasses (BOP and PACMAD clades; Soreng *et al.*, 2015), and joined fragmented transcripts  
172 from a single data set if they were nested within the same phylogenetic group. The tree inference  
173 was then repeated with 100 bootstraps, and the trees were again manually inspected, discarding  
174 candidates where the nesting was supported by <70% bootstrap replicates. Finally, BLASTx was

175 used to annotate the LGT candidates against the SwissProt database.

176

177 After these two successive filters, retained candidates were subjected to further validation. To verify  
178 the nesting of the candidate LGT was not due to convergent adaptive amino acid substitutions, we  
179 generated phylogenetic trees based solely on 3<sup>rd</sup> codon positions, which are less subject to positive  
180 selection (Christin *et al.*, 2012b). Phylogenetic trees were generated as above and were manually  
181 inspected to confirm the LGT scenario. To verify that the LGT scenario was statistically better than  
182 the species tree, we then conducted approximately unbiased (AU) topology tests that compared the  
183 maximum likelihood topology with a topology representing the null hypothesis (forcing monophyly  
184 of the donor and recipient clades; recipients for the within-Panicaceae analysis were constrained at the  
185 genus level if they did not belong to the Cenchrinae or Panicinae). The null topology was inferred  
186 by first constraining the clades and inferring a tree with the GTR + G model in RaxML v.8.2.12  
187 (Stamatakis, 2014), before using this topology as a constraint for a maximum likelihood phylogeny  
188 inferred with PhyML as described above. The AU tests were then performed in Consel v.1.20  
189 (Shimodaira & Hasegawa, 2001) using the site-wise likelihood values generated by PhyML, and p-  
190 values were Bonferroni corrected to account for multiple testing. LGTs with non-significant results  
191 (p-value > 0.05) were discarded. In some cases, no native copy was present in any species from the  
192 group containing the focus species, preventing AU tests. These genes were retained, although the  
193 numbers were recorded separately (Table 2; n.b. statistics reported and values quoted in the text  
194 include these genes).

195

196 For candidates retained after these extra validation steps, new phylogenetic trees were inferred with  
197 a denser species sampling to refine the identification of the potential donor. Illumina short-read data  
198 sets (n = 71; 65 sp.; Table S1) were added to the trees using the method described in Dunning *et al.*,  
199 (2019). The dense trees were then manually inspected and any presenting strong discrepancies with



200 the expected species relationships were discarded.

201

202 In summary, To be considered as an LGT each gene (i) had to be nested within one of the other four  
203 groups of grasses (Figure 1); (ii) their nesting had to be well supported ( $\geq 70\%$  bootstrap support);  
204 (iii) potential paralogy problems had to be ruled out (i.e. discarding phylogenies with multiple  
205 apparent duplication events that can explain the phylogenetic incongruence); (iv) the nesting had to  
206 be supported by phylogenetic trees constructed solely from the 3rd codon positions, which are less  
207 subject to adaptive convergent evolution; and (v) where possible, the nesting had to be supported by  
208 approximately unbiased (AU) tests to confirm the LGT topology was a significantly better fit than a  
209 topology constrained to match the species tree (see Figure 2 for exemplar LGT). Phylogenetic trees  
210 and alignments are included as supplementary datasets. All analyses were performed using publicly  
211 available data (Table S1).

212

## 213 *2.2 Synteny analyses*

214 Synteny analyses were performed for a subset of seven diploid grass genomes with high-quality  
215 reference genomes (*Brachypodium distachyon*, *Oryza sativa*, *Oropetium thomaeum*, *Panicum hallii*,  
216 *Setaria italica*, *Sorghum bicolor*, and *Zea mays*) using SynFind (Tang *et al.*, 2015). For each LGT in  
217 these species, we determined whether genes from the other reference genomes identified as  
218 orthologs to the native copy in the phylogenetic trees were syntenic to the LGT or the native copy  
219 based on the highest syntelog score (Table S3).

220

## 221 *2.3 Analyses of replicate sequencing runs to check for potential contamination*

222 Independently sequenced runs for each of the model species were screened for the presence of each  
223 LGT, as potential contaminations would not appear in multiple replicates. Paired-end Illumina  
224 whole-genome data were obtained from NCBI Sequence Read Archive and mapped to the reference

225 genome using bowtie2 v.2.3.5.1 (Langmean & Salzberg, 2012). Mean coverage depths for the  
226 coding sequence of each gene in the genome were then calculated using bedtools v2.26.0 (Quinlan  
227 & Hall, 2010), with large bam files down-sampled with Picard Tools v.2.13.2-SNAPSHOT (Broad  
228 Institute, 2019).

229

#### 230 2.4 Grass traits

231 Plant traits were obtained from a variety of sources. Life history, distribution, growth form and the  
232 domestication status were retrieved from GrassBase (Clayton *et al.*, 2016). 1C Genome sizes were  
233 obtained from the Plant DNA C-values database (Bennett & Leitch, 2005), and climatic information  
234 from Watcharamongkol *et al.*, (2018). The climate data for *Oropetium thomaeum* was not included  
235 in Watcharamongkol *et al.*, (2018), and was therefore retrieved from GBIF (GBIF.org; 11th July  
236 2019) GBIF Occurrence Download <https://doi.org/10.15468/dl.wyhtoo>) and WorldClim (Harris *et*  
237 *al.*, 2014; Fick & Hijmans, 2017) using the same methods. All statistical tests were performed in R  
238 v.3.0.2, with the expected frequencies for chi-square tests based on the number of genes tested  
239 within each species (Table 1). The Kruskal-Wallis tests performed using absolute LGT numbers,  
240 which were divided into donor groups when testing whether some clades were more frequent  
241 donors than others. To determine if any trait or genome feature was associated with the number of  
242 LGT, we performed phylogenetic generalized least squares (PGLS) to account for the relatedness  
243 between samples. The PGLS analysis was performed in R with the 'caper' package (Orme *et al.*,  
244 2013) using a time-calibrated phylogenetic tree retrieved from Christin *et al.*, (2014), and various  
245 traits as explanatory variables (Table 1). Individual and iterative models were performed, removing  
246 the least significant variable until only significant variables remained (p-value <0.05).

247

248

249

### 250 3. Results

#### 251 3.1 LGT occurs in all lineages and functional types of grass

252 Out of the 817,612 grass genes from the 17 grass genomes (Table 1) screened, 55.89% had  
253 sufficient homologous grass sequences ( $\geq 10$  taxa) for reliable phylogenetic reconstruction (Table 2  
254 & Table S2), and were tested for LGT. A majority (99.73%) of the initial 37-taxa phylogenies did  
255 not support a scenario of LGT among the five grass groups, with successive filtering resulting in the  
256 identification of 135 LGT candidates across the 17 grass genomes in this initial analysis (Table 2;  
257 full results Table S2). The number of LGT received varied among species (p-value  $< 0.01$ ; Chi-  
258 square test; mean = 8.4; SD=9.0; range=0 – 34; Table S2), with the highest numbers observed in  
259 *Panicum virgatum* (n= 30), *Alloteropsis semialata* (n=20), and *Cenchrus americanus* (n=15). It  
260 should be noted that only a subset of the 59 previously reported LGT in *Alloteropsis semialata*  
261 (Dunning *et al.*, 2019) are retrieved as the previous analysis examined additional groups of donors  
262 not considered here, and secondary candidates based solely on read-mapping patterns were not  
263 recorded in the present study. Despite the significant variation between species, the difference  
264 among the five phylogenetic groups was not significant (p-value = 0.16, Kruskal-Wallis test).  
265 Overall, our results show that LGT is widespread across the grass family and occurs in a majority of  
266 species (Figure 1; Table 2). No LGT were detected in four of the 17 species analysed, but some  
267 LGT might remain undetected due to our stringent phylogenetic filtering, and because we are only  
268 considering transfers among the predefined five grass clades.

269

270 Among the 17 species screened, LGT is observed in all functional groups (Figure 3). We detected  
271 LGT in wild species, but also in major crops. For instance, maize (*Zea mays*) has 11 LGT received  
272 from Chloridoideae and Paniceae, while wheat (*Triticum aestivum*) has 10 LGT received from  
273 Andropogoneae, Chloridoideae and Paniceae (Table 2). The LGTs may be beneficial for the crops,  
274 with transferred loci including some with functions related to abiotic stress tolerance and disease

275 resistance (Table S2). Across all plant properties, LGT seems to be more abundant in perennial,  
276 rhizomatous and C<sub>4</sub> species (Figure 3). A phylogenetic generalized least squares (PGLS) analysis  
277 was conducted to test for an effect of all traits while accounting for phylogenetic effects. For this we  
278 constructed a model to explain the absolute number of LGTs using nine traits as predictor variables  
279 (Table 1) and a time-calibrated phylogenetic tree retrieved from Christin *et al.*, (2014). Initially,  
280 models were constructed for each predictor variable, with the amount of LGT shown to increase  
281 with the presence of rhizomes (p-value = 0.026, adjusted R<sup>2</sup> = 0.243) and the number of genes  
282 tested (p-value = 0.038, adjusted R<sup>2</sup> = 0.207). We subsequently performed a combined model with  
283 all explanatory variables to test for their joint effects. Iterative models were performed, removing  
284 the least significant variable until only significant variables remained (p-value <0.05). The PGLS  
285 analysis (combined adjusted R<sup>2</sup> = 0.652) identified three characteristics that jointly increased the  
286 number of LGT: the number of genes tested (p-value < 0.001), the presence of rhizomes (p-value =  
287 0.002), and the ploidy level (p-value = 0.006). Future studies should use larger sample sizes to  
288 definitely demonstrate the effects, but our analyses suggest that some categories of grasses are more  
289 likely to be involved in LGT.

290

### 291 *3.2 LGT are more commonly received from closely related species*

292 Overall, some clades acted more frequently as donors (p-value < 0.01, Kruskal-Wallis test).  
293 Specifically, the Andropogoneae were the source of most transfers (Table 2). However, these were  
294 mainly received by members of Paniceae, which are the closest relatives of Andropogoneae in our  
295 dataset, and are also represented by the most genomes (Table 1). While these patterns suggest that  
296 LGT occurs more frequently among close relatives, directly comparing the rates is difficult because  
297 the clades vary in their number of species, number of genomes available and age. However, for a  
298 given clade of recipients, it is possible to compare the frequency of different groups of donors. We  
299 therefore focused on the identity of donors of LGT to Paniceae, the group with the highest number

300 of complete genomes.

301

302 Seven Paniceae genomes were used in this study, and this increased sample size further allows to  
303 detect intra-Paniceae LGT. We therefore reported the number of LGT transferred from the Panicinae  
304 and Cenchrinae subgroups of Paniceae (each represented by two genomes) to other Paniceae, in  
305 addition to those received from other groups. In total, we identify 129 LGT across the seven  
306 Paniceae genomes, 35 of which were transferred from the Cenchrinae and Panicinae subgroups  
307 (Table 3; full results Table S4). When focusing on Paniceae recipients, some groups are more often  
308 LGT donors than others even after correcting for the number of species in each donor clade ( $p <$   
309  $0.01$ , Kruskal-Wallis test). The number of LGT given per species decreases with the phylogenetic  
310 distance to Paniceae, reaching lowest levels in the BOP clade (Pooideae and Oryzoideae; Figure 4).

311

### 312 *3.3 Ruling out alternative hypotheses*

313 There are four main alternative hypothesis to LGT: [1] incomplete lineage sorting, [2] unrecognised  
314 paralogy, [3] hybridisation, [4] contamination, and [5] phylogenetic bias, such as convergent  
315 evolution. Below we present evidence reducing the likelihood of these alternative explanations.

316

317 [1] Incomplete lineage sorting: for a majority of the LGTs we detect (79.4%), the recipient genome  
318 also contains a native copy, which argues against incomplete lineage sorting as an alternative  
319 hypothesis. However, as pseudogenization of the native copy has been observed in cases where the  
320 LGT acts as a functional replacement (Dunning *et al.*, 2019), their continued coexistence should not  
321 always be expected. The coexistence of native and laterally acquired orthologs permits us to  
322 compare patterns of synteny in multiple species to rule out unrecognised paralogy problems.

323

324 [2] Unrecognised paralogy: we used seven diploid species for this analysis, with at least one

325 representative from each of the five groups. For each LGT detected in these seven species, we  
326 determined whether the genes from the other six species identified as orthologous in the  
327 phylogenetic tree were syntenic to the LGT or the native gene. In no instance was a gene from  
328 another model species syntenic with the LGT, with 76.3% being syntenic with the native copy, and  
329 23.7% being syntenic to neither (Table S3). The synteny analyses therefore confirm that our  
330 phylogenetic trees identify true orthologs in most cases, and the phylogenetic patterns suggesting  
331 LGT cannot be explained by widespread unrecognised paralogy.

332

333 [3] Hybridisation: the patterns of synteny between the native and laterally acquired genes also argue  
334 against straightforward hybridisation through sexual reproduction and chromosomal recombination  
335 during the transfers, as already argued previously (Dunning *et al.*, 2019). Indeed the LGTs appear to  
336 be inserted into the genome in random locations, often on different chromosomes as the native  
337 orthologs.

338

339 [4] Contamination: we rule out contamination as the source of the foreign DNA in the 13 genomes  
340 with LGT by confirming the presence of the laterally acquired DNA in multiple independent  
341 sequencing runs (Table S5 and Figure S1). For six of the reference genomes, 'gold-standard'  
342 datasets exists, i.e. whole-genome resequencing data sets for the same cultivar as the reference  
343 genome, but that were produced independently from the initial assembly project. For the remaining  
344 7 species, only the whole-genome data used to generate the reference assembly exists, with all but  
345 one (*Leersia perrieri*) having multiple sequencing libraries/runs. For each dataset, we compare the  
346 genome-wide mean coverage for each gene to that of the identified LGT (Table S5 and Figure S1).  
347 All LGTs had sequencing data in the multiple datasets apart from one gene in *Z. mays*. For this  
348 species, we used seven datasets from the same cultivar that were produced independently in seven  
349 different labs. Only five out of these seven datasets supported the presence of the LGT

350 *Zm00001d039537*, with the most parsimonious explanation being LGT variation between  
351 individuals, as previously documented in *Alloteropsis semialata* (Dunning *et al.*, 2019). A majority  
352 of LGTs had coverage depths greater than the 5<sup>th</sup> (97.0% of LGTs) and 2.5<sup>th</sup> (99.0% of LGTs)  
353 percentile of coverage depth for all genes in the genome (Table S5 and Figure S1). Overall, these  
354 results confirm that contamination in the original reference genomes is not responsible for the  
355 presence of the LGT in the sequence datasets.

356

357 [5] Phylogenetic bias: convergent evolution or other systematic biases in the data could lead to  
358 gene/species tree discordance (Chang & Campbell, 2000). In addition to confirming the patterns  
359 with phylogenetic trees built on third positions of codons, we assessed the similarity between the  
360 recipient and donor species in non-coding DNA. The mapping of short-read data to four genomes  
361 confirmed a high similarity between the putative donor and recipient on intron sequences of LGT in  
362 addition to exons (Figure 2). It was however not possible to delimit with high precision the laterally  
363 acquired fragments detected here (as done for *A. semialata* in Olofsson *et al.*, 2019), either because  
364 the transfers are too ancient or because we lack whole genome data for very close relatives of the  
365 donors. The observation of some intergenic regions with high similarity (Figure S2), together with  
366 intronic similarities (Figure 2), still rules out convergent evolution or other phylogenetic biases (e.g.  
367 long branch attraction) as being responsible for all detected cases of gene/species tree discordance.

368

369

370

371

372

373

374

#### 375 **4. Discussion**

376 Lateral gene transfer is a potent evolutionary force capable of having a profound impact on the  
377 evolutionary trajectory of a species (Li et al., 2014; Cheng et al., 2019; Phansopa et al. In press).  
378 Here, we use grasses as a model system to investigate the factors that dictate the prevalence of LGT  
379 among plants. Using a combination of stringent phylogenetic and genomic analyses, we have  
380 identified a grand total of 170 genes (approximately 3.72 LGT per 10,000 genes; 135 in the first  
381 round of analyses and 35 among groups of Paniceae) that have been laterally transferred to 13 of the  
382 17 complete grass genomes that were screened (Table 1 & Table 3). Our approach was developed to  
383 drastically reduce the amount of false positives, and is purposely very conservative. This enables us  
384 to minimise the effects of other evolutionary processes such as hybridisation and incomplete lineage  
385 sorting. As a result, the number of LGT identified is likely only a subset of those existing in the  
386 complete grass genomes. In addition, the phylogenetic filtering prevents us from detecting LGT  
387 from clades of grasses for which no genome is available. With the current sampling, at least 30% of  
388 the grass diversity is never considered as potential LGT donors (Soreng *et al.*, 2015).

389

390 Our phylogenetic pipeline prevents us from detecting LGT happening among members of the same  
391 group of grasses, such as the numerous exchanges among lineages of Paniceae previously detected  
392 (Dunning *et al.*, 2019). This is perfectly exemplified by the case of *A. semialata*, in which 59 LGT  
393 were previously detected (Dunning *et al.*, 2019). Here, only 20 were identified when considering  
394 solely LGT among the five higher groups (Table 2), while a further 13 were detected when  
395 considering subgroups of Paniceae as potential donors (Table 3). The other LGTs previously  
396 identified for *A. semialata* were not detected in the present study because of slight methodological  
397 differences (e.g. less donor clades considered and sampling more genomes means greater multiple  
398 testing correction), and because we did not screen the flanking regions of LGTs for additional genes  
399 with high sequence similarity in the present study due to the larger scale of the present analyses,



400 varying genome assembly contiguity, and a lack of whole-genome data for some donor species.  
401 Conversely, improvements in the initial screening approach (i.e. removing an initial read-mapping  
402 step from Dunning *et. al.*, 2019 method) resulted in the identification of four novel LGT. These  
403 examples prove that our ability to detect LGT depends on many factors and strongly suggest that  
404 the LGTs we report here concern only a small fraction of those existing in grass genomes. Finally,  
405 our approach precludes the detection of older LGT that are shared by multiple individuals within a  
406 clade. Despite these limitations, we show that LGT is common in grasses, certain groups exchange  
407 more genes than others, the frequency of LGT appears to increase in rhizomatous species, and there  
408 may be a role of phylogenetic distance underpinning the LGT dynamics.

409

#### 410 *4.1 LGT occurs in all functional groups, and is especially prevalent in rhizomatous species*

411 LGT is common in grasses and is observed in each of the five groups investigated here (Figure 1).  
412 We detected LGT in domesticated and wild species alike (Figure 3), although it is currently  
413 unknown whether the LGTs occurred before or after domestication and whether these genes are  
414 associated with agronomic traits. The genetic exchanges are not restricted to any functional  
415 category of grasses (Figure 3), and the ubiquity of the phenomenon provides some support for a  
416 breakdown in reproductive behaviour and illegitimate pollination as the mechanism responsible for  
417 the transfers as wind pollination is universal in this group. However, there is a statistical increase of  
418 the number of LGT in rhizomatous species and two of the three species with the highest numbers of  
419 LGT (*Alloteropsis semialata* and *Panicum virgatum*) are perennials that can propagate vegetatively  
420 via rhizomes (Table 1 & Table 3). These patterns suggest that root-to-rhizome contact (i.e.  
421 inosculation) provides an increased opportunity for retaining gene transfers, as the integration of  
422 foreign DNA in rhizome tissue means that any subsequent plant material regrown from these cells,  
423 including reproductive tissue, will contain the LGT. This hypothesis is compatible with previous  
424 reports of genetic exchanges following grafts (Stegemann & Bock, 2009). In this instance, LGT is

425 similar to somatic mutations occurring in clonal species, as documented in the seagrass (*Zostera*  
426 *mariana*) where they can ultimately enter the sexual cycle (Yu *et al.*, 2020). The genetic bottleneck  
427 and selection characterising rhizomes would further increase the chance of LGT retention,  
428 especially if these provide a selective advantage (Yu *et al.*, 2020). However, we did not detect LGT  
429 in the third rhizomatous species we sampled (*Zoysia japonica*; Table 1). Increased species  
430 sampling, particularly for rhizomatous species represented by only three genomes in this study, is  
431 now needed to confirm our conclusions and precisely quantify the impact of growth form on the  
432 amount of gene transfers and how it interacts with other factors.

433

#### 434 4.2 It is easier to acquire genes from close relatives

435 Within grasses, there is an effect of the phylogenetic distance on the number of transfers observed,  
436 as shown by the Paniceae receiving more LGT from closer relatives (Figure 4). This pattern mirrors  
437 that observed in prokaryotes (Popa & Dagan, 2011; Skippington & Ragan, 2012; Soucy *et al.*, 2015)  
438 and insects (Peccoud *et al.*, 2017), where the frequency of transfers is higher between closely  
439 related species. In prokaryotes, this effect is thought to result from more similar DNA sequence  
440 promoting homologous replacement of the native copy (Skippington & Ragan, 2012). This is  
441 unlikely to play a role in grasses as the LGTs are inserted in non-syntenic positions in the genome  
442 where they coexist with the native copy, often on different chromosomes (Table S3). However,  
443 stretches of DNA similar between the donor and recipient (e.g. transposable elements) may still be  
444 involved in the incorporation of the LGT onto the chromosomes, a hypothesis that can be tested  
445 when genome assemblies for donor species are available (e.g. *Themeda triandra*; Dunning *et al.*  
446 2019). Alternatively, the effect of the phylogenetic distance might stem from the regulation of the  
447 LGT post acquisition, with genes transferred from closely related species more likely to share  
448 regulatory mechanisms. In such a scenario, the phylogenetic effect would reflect the utility of the  
449 LGT for the recipient species and therefore selection after the transfer rather than the rate of

450 transfer. Overall, our analyses indicate that it is easier to either obtain LGT from close relatives or  
451 to use it after the transfers, thereby increasing the chance of selectively retaining it.

452

#### 453 *4.3 The role of overlapping distributions.*

454 In addition to genomic compatibility, the probability of co-occurrence in the wild might decrease  
455 with divergence time, explaining the observed effect of phylogenetic distance (Figure 4). Paniceae  
456 grasses generally grow in biodiverse savannas that are dominated by Andropogoneae species in  
457 wetter areas, and Chloridoideae grasses in drier habitats (Lehmann *et al.*, 2019). The effects of  
458 phylogenetic distance are therefore confounded with those of biogeography, but specific examples  
459 indicate that biogeography can take precedence.

460

461 We observe some transfers between Pooideae and Paniceae, two groups that diverged >50 Ma,  
462 representing one of the earliest splits within this family (GWPGII, 2012). This indicates that LGT is  
463 possible across the whole grass family. In our dataset, the only recipient of these transfers is  
464 *Dichanthelium oligosanthos* (Table 2), a frost-tolerant grass from North America that inhabits  
465 colder areas than other members of the Paniceae (Studer *et al.*, 2016). In cold regions, *D.*  
466 *oligosanthos* co-occurs with members of the Pooideae, and this biogeographic pattern likely  
467 facilitated exchanges between the two groups of grasses. However, given the difficulties of  
468 identifying the donor to the species level (or even genus) with the current data, we can not be sure  
469 that the specific donor and *D. oligosanthos* co-occur. As more whole-genome datasets become  
470 available for the diverse Pooideae, co-occurrence between the donor and recipient species can be  
471 directly tested.

472

473 Biogeography might also be responsible for differences in the identity of the LGT donors between  
474 the two closely related *Panicum* species. Indeed, a majority (75%) of LGT in *Panicum hallii* were

475 received from Chloridoideae, while a majority (81%) of those in *Panicum virgatum* were received  
476 from Andropogoneae (Table 3). This pattern mirrors the dominant grassland type (Chloridoideae vs.  
477 Andropogoneae) for a majority of the range of each of the two species, and the area from which the  
478 individual for the genome assembly was sampled (Lovell *et al.*, 2018; Lehmann *et al.*, 2019).

479

480 Quantifying the effects of biogeography as opposed to other factors requires identifying the donor  
481 to the species level and a detailed description of the spatial distribution of each grass species,  
482 including their abundances. Indeed, the likelihood of encounters will increase with the number of  
483 individuals of the donor species and not just its presence. Such ecological datasets coupled with  
484 genomic data for a large numbers of grasses will be key to future studies of LGT dynamics in this  
485 group of plants.

486

#### 487 4.4 Conclusions

488 Using stringent phylogenomic filtering, we have shown that lateral gene transfer (LGT) is a  
489 widespread process in grasses, where it occurs in wild species as well as in widely cultivated crops  
490 (e.g. maize and wheat). LGT does not appear restricted to particular functional types, although it  
491 seems to increase in rhizomatous species, where vegetative growth offers extra opportunities for  
492 gene transfers into the germline. In addition, we show that the amount of successful transfers  
493 decreases with phylogenetic distance. This effect of the phylogenetic distance might result from  
494 increased genomic compatibility among more related groups. Alternatively, groups that diverged  
495 more recently might be more likely to co-occur, offering more opportunities for genetic exchanges.  
496 Indeed, biogeography seems to have an overall effect on the frequency of LGT, as the only species  
497 that received genes from a group that diverged more than 50 million years ago is the one with an  
498 overlapping distribution following a relatively recent niche shift. Overall, our study shows that LGT  
499 occurs in a variety of grasses, and the frequent movements of functional genes can strongly impact

500 the evolution of this group of plants.

501

502

503

504

505

506

507

508

509

510

511

512

513

514

515

516

517

518

519

520

521

522

523

524

525 **5. Acknowledgements**

526 This work was funded by a European Research Council Grant (ERC-2014-STG-638333) and a  
527 Royal Society Research Grant (RGF\EA\180247). P.-A.C. is supported by a Royal Society  
528 University Research Fellowship (URF\R\180022). L.T.D is supported by a Natural Environment  
529 Research Council Independent Research Fellowship (NE/T011025/1).

530

531 **6. Authors' contributions**

532 All authors designed the project. LTD, SGSH and PR conducted the analyses. LTD, PAC and SGSH  
533 wrote the paper, with the help of PR.

534

535

536

537

538

539

540

541

542

543

544

545

546

547

548

549

550 **7. References**

- 551 **Andersson JO. 2005.** Lateral gene transfer in eukaryotes. *Cellular and Molecular Life Sciences*  
552 *CMLS* **62**: 1182-1197.
- 553 **Barrett RD, Schluter D. 2008.** Adaptation from standing genetic variation. *Trends in Ecology &*  
554 *Evolution* **23** :38-44.
- 555 **Bennett MD, Leitch IJ. 2005.** Plant DNA C-values database. <https://cvalues.science.kew.org/>
- 556 **Bennetzen JL, Schmutz J, Wang H, Percifield R, Hawkins J, Pontaroli AC, ... Jenkins J. 2012.**  
557 Reference genome sequence of the model plant *Setaria*. *Nature Biotechnology* **30**: 555.
- 558 **Bowman JL, Kohchi T, Yamato KT, Jenkins J, Shu S, Ishizaki K, Yamaoka S, Nishihama R,**  
559 **Nakamura Y, Berger F, Adam C. 2017.** Insights into land plant evolution garnered from the  
560 *Marchantia polymorpha* genome. *Cell* **171**: 287-304.
- 561 **Broad Institute. 2019.** Picard Toolkit. GitHub Repository. <http://broadinstitute.github.io/picard/>
- 562 **Cannarozzi G, Plaza-Wüthrich S, Esfeld K, Larti S, Wilson YS, Girma D, ... Lyons E. 2014.**  
563 Genome and transcriptome sequencing identifies breeding targets in the orphan crop tef  
564 (*Eragrostis tef*). *BMC Genomics* **15**: 581.
- 565 **Chang BS, Campbell DL. 2000.** Bias in phylogenetic reconstruction of vertebrate rhodopsin  
566 sequences. *Molecular Biology and Evolution* **17**: 1220-31.
- 567 **Chen F, Dong W, Zhang J, Guo X, Chen J, Wang Z, ... Zhang L. 2018.** The sequenced  
568 angiosperm genomes and genome databases. *Frontiers in Plant Science* **9**: 418.
- 569 **Cheng S, Xian W, Fu Y, Marin B, Keller J, Wu T, Sun W, Li X, Xu Y, Zhang Y, Witttek S. 2019.**  
570 Genomes of subaerial Zygnematophyceae provide insights into land plant evolution. *Cell* **179**:  
571 1057-67.
- 572 **Christin PA, Besnard G, Edwards EJ, Salamin N. 2012.** Effect of genetic convergence on  
573 phylogenetic inference. *Molecular Phylogenetics and Evolution* **62**: 921-927.

- 574 **Christin PA, Edwards EJ, Besnard G, Boxall SF, Gregory R, Kellogg EA, ... Osborne CP.**  
575 **2012.** Adaptive evolution of C<sub>4</sub> photosynthesis through recurrent lateral gene transfer. *Current*  
576 *Biology* **22**: 445-449.
- 577 **Christin PA, Spriggs E, Osborne CP, Strömberg CA, Salamin N, Edwards EJ. 2014.** Molecular  
578 dating, evolutionary rates, and the age of the grasses. *Systematic Biology* **63**: 153-165.
- 579 **Clayton WD, Vorontsova MS, Harman KT, Williamson H. 2016.** GrassBase - The Online World  
580 Grass Flora.
- 581 **Doolittle WF. 1999.** Lateral genomics. *Trends in Biochemical Sciences* **24**: M5-M8.
- 582 **Dunning LT, Olofsson JK, Parisod C, Choudhury RR, Moreno-Villena JJ, Yang Y, ... Christin**  
583 **PA. 2019.** Lateral transfers of large DNA fragments spread functional genes among grasses.  
584 *Proceedings of the National Academy of Sciences of the United States of America* **116**: 4416-  
585 4425.
- 586 **Fick SE, Hijmans RJ. 2017.** WorldClim 2: new 1-km spatial resolution climate surfaces for global  
587 land areas. *International Journal of Climatology* **37**: 4302-4315.
- 588 **Freschi L, Vincent AT, Jeukens J, Emond-Rheault JG, Kukavica-Ibrulj I, Dupont MJ, ...**  
589 **Levesque RC. 2018.** The *Pseudomonas aeruginosa* pan-genome provides new insights on its  
590 population structure, horizontal gene transfer, and pathogenicity. *Genome Biology and*  
591 *Evolution* **11**: 109-120.
- 592 **Gao C, Ren X, Mason AS, Liu H, Xiao M, Li J, Fu D. 2014.** Horizontal gene transfer in plants.  
593 *Functional & Integrative Genomics* **14**: 23-29.
- 594 **Goff SA, Ricke D, Lan TH, Presting G, Wang R, Dunn M, ... Hadley D. 2002.** A draft sequence  
595 of the rice genome (*Oryza sativa* L. ssp. *japonica*). *Science* **296**: 92-100.



- 596 **Grass Phylogeny Working Group II. 2012.** New grass phylogeny resolves deep evolutionary  
597 relationships and discovers C<sub>4</sub> origins. *New Phytologist* **193**: 304– 312.
- 598 **Guindon S, Gascuel O. 2003.** A simple, fast, and accurate algorithm to estimate large phylogenies  
599 by maximum likelihood. *Systematic Biology* **52**: 696-704.
- 600 **Guo L, Qiu J, Ye C, Jin G, Mao L, Zhang H, ... Lin Z. 2017.** *Echinochloa crus-galli* genome  
601 analysis provides insight into its adaptation and invasiveness as a weed. *Nature*  
602 *Communications* **8**: 1031.
- 603 **Harris IPDJ, Jones PD, Osborn TJ, Lister DH. 2014.** Updated high-resolution grids of monthly  
604 climatic observations—the CRU TS3. 10 Dataset. *International Journal of Climatology* **34**:  
605 623-642.
- 606 **Husnik F, McCutcheon JP. 2018.** Functional horizontal gene transfer from bacteria to eukaryotes.  
607 *Nature Reviews Microbiology* **16**: 67.
- 608 **International Barley Genome Sequencing Consortium. 2012.** A physical, genetic and functional  
609 sequence assembly of the barley genome. *Nature* **491**: 711.
- 610 **International Brachypodium Initiative. 2010.** Genome sequencing and analysis of the model  
611 grass *Brachypodium distachyon*. *Nature* **463**: 763.
- 612 **International Wheat Genome Sequencing Consortium. 2014.** A chromosome-based draft  
613 sequence of the hexaploid bread wheat (*Triticum aestivum*) genome. *Science* **345**: 1251788.
- 614 **Katoh K, Standley DM. 2013.** MAFFT multiple sequence alignment software version 7:  
615 improvements in performance and usability. *Molecular Biology and Evolution* **30**: 772-780.
- 616 **Keeling PJ, Palmer JD. 2008.** Horizontal gene transfer in eukaryotic evolution. *Nature Reviews*  
617 *Genetics* **9**: 605.
- 618 **Kellogg EA, Buell CR. 2009.** Splendor in the grasses. *Plant Physiology* **149**: 1-3.

- 619 **Langmead B, Salzberg SL. 2012.** Fast gapped-read alignment with Bowtie 2. *Nature Methods* **9**:  
620 357-359.
- 621 **Lefort V, Longueville JE, Gascuel O. 2017.** SMS: Smart model selection in PhyML. *Molecular*  
622 *Biology and Evolution* **34**: 2422-2424.
- 623 **Lehmann CE, Griffith DM, Simpson KJ, Anderson TM, Archibald S, Beerling DJ, ... Fox DL.**  
624 **2019.** Functional diversification enabled grassy biomes to fill global climate space. *BioRxiv*  
625 **583625.**
- 626 **Li FW, Villarreal JC, Kelly S, Rothfels CJ, Melkonian M, Frangedakis E, ... Burge DO .2014.**  
627 Horizontal transfer of an adaptive chimeric photoreceptor from bryophytes to ferns.  
628 *Proceedings of the National Academy of Sciences of the United States of America* **111**: 6672-  
629 6677.
- 630 **Lovell JT, Jenkins J, Lowry DB, Mamidi S, Sreedasyam A, Weng X, ... Gordon SP .2018.** The  
631 genomic landscape of molecular responses to natural drought stress in *Panicum hallii*. *Nature*  
632 *Communications* **9**: 5213.
- 633 **Mahelka V, Krak K, Kopecký D, Fehrer J, Šafář J, Bartoš J, Blattner FR. 2017.** Multiple  
634 horizontal transfers of nuclear ribosomal genes between phylogenetically distinct grass  
635 lineages. *Proceedings of the National Academy of Sciences of the United States of America*  
636 **114**: 1726-1731.
- 637 **Maumus F, Epert A, Nogué F, Blanc G. 2014.** Plant genomes enclose footprints of past infections  
638 by giant virus relatives. *Nature Communications* **5**: 4268.
- 639 **Moreno-Villena JJ, Dunning LT, Osborne CP, Christin PA. 2017.** Highly expressed genes are  
640 preferentially co-opted for C<sub>4</sub> photosynthesis. *Molecular Biology and Evolution* **35**: 94-106.
- 641 **Ochman H, Lawrence JG, Groisman EA. 2000.** Lateral gene transfer and the nature of bacterial  
642 innovation. *Nature* **405**: 299.

- 643 **Olofsson JK, Dunning LT, Lundgren MR, Barton HJ, Thompson J, Cuff N, Ariyaratne M,**  
644 **Yakandawala D, Sotelo G, Zeng K, Osborne CP. 2019.** Population-specific selection on  
645 standing variation generated by lateral gene transfers in a grass. *Current Biology* **29**: 3921-7.
- 646 **Orme D, Freckleton R, Thomas G, Petzoldt T, Fritz S. 2013.** The caper package: comparative  
647 analysis of phylogenetics and evolution in R. *R package version 5*: 1-36.
- 648 **Paterson AH, Bowers JE, Bruggmann R, Dubchak I, Grimwood J, Gundlach H, ... Schmutz J.**  
649 **2009.** The *Sorghum bicolor* genome and the diversification of grasses. *Nature* **457**: 551.
- 650 **Peccoud J, Loiseau V, Cordaux R, & Gilbert C. 2017.** Massive horizontal transfer of transposable  
651 elements in insects. *Proceedings of the National Academy of Sciences of the United States of*  
652 *America* **114**: 4721-4726.
- 653 **Phansopa C, Dunning LT, Reid JD, Christin PA. In Press.** Lateral gene transfer acts as an  
654 evolutionary shortcut to efficient C4 biochemistry. *Molecular Biology and Evolution*  
655 doi:10/1093/molbev/msaa143
- 656 **Popa O & Dagan T. 2011.** Trends and barriers to lateral gene transfer in prokaryotes. *Current*  
657 *Opinion in Microbiology* **14**: 615-623.
- 658 **Prentice HC, Li Y, Lönn M, Tunlid A, Ghatnekar L 2015.** A horizontally transferred nuclear gene  
659 is associated with microhabitat variation in a natural plant population. *Proceedings of the*  
660 *Royal Society B: Biological Sciences* **282**: 20152453.
- 661 **Quinlan AR, Hall IM. 2010.** BEDTools: a flexible suite of utilities for comparing genomic  
662 features. *Bioinformatics* **26**: 841-842.
- 663 **Richardson AO, Palmer JD. 2007.** Horizontal gene transfer in plants. *Journal of Experimental*  
664 *Botany* **58**: 1-9.

- 665 **Schönknecht G, Weber AP, Lercher MJ. 2014.** Horizontal gene acquisitions by eukaryotes as  
666 drivers of adaptive evolution. *Bioessays* **36**: 9-20.
- 667 **Schnable PS, Ware D, Fulton RS, Stein JC, Wei F, Pasternak S, ... Minx P. 2009.** The B73  
668 maize genome: complexity, diversity, and dynamics. *Science* **326**: 1112-1115.
- 669 **Soreng RJ, Peterson PM, Romaschenko K, Davidse G, Zuloaga FO, Judziewicz EJ, ...  
670 Morrone O. 2015.** A worldwide phylogenetic classification of the Poaceae (Gramineae).  
671 *Journal of Systematics and Evolution* **53**: 117-137.
- 672 **Soucy SM, Huang J, Gogarten JP. 2015.** Horizontal gene transfer: building the web of life.  
673 *Nature Reviews Genetics* **16**: 472.
- 674 **Shimodaira H, Hasegawa M. 2001.** CONSEL: for assessing the confidence of phylogenetic tree  
675 selection. *Bioinformatics* **17**: 1246-1247.
- 676 **Skipington E, Ragan MA. 2012.** Phylogeny rather than ecology or lifestyle biases the  
677 construction of *Escherichia coli*–*Shigella* genetic exchange communities. *Open Biology* **2**:  
678 120112.
- 679 **Stamatakis A. 2014.** RAxML version 8: a tool for phylogenetic analysis and post-analysis of large  
680 phylogenies. *Bioinformatics* **30**: 1312-1313.
- 681 **Stegemann S, Bock R. 2009.** Exchange of genetic material between cells in plant tissue grafts.  
682 *Science* **324**: 649-51.
- 683 **Stein JC, Yu Y, Copetti D, Zwickl DJ, Zhang L, Zhang C, ... Wei S. 2018.** Genomes of 13  
684 domesticated and wild rice relatives highlight genetic conservation, turnover and innovation  
685 across the genus *Oryza*. *Nature Genetics* **50**: 285.
- 686 **Studer AJ, Schnable JC, Weissmann S, Kolbe AR, McKain MR, Shao Y, ... Brutnell TP. 2016.**  
687 The draft genome of the C<sub>3</sub> panicoid grass species *Dichanthelium oligosanthes*. *Genome*  
688 *Biology* **17**: 223.

- 689 **Tanaka H, Hirakawa H, Kosugi S, Nakayama S, Ono A, Watanabe A, ... Shimizu K. 2016.**  
690 Sequencing and comparative analyses of the genomes of zoysiagrasses. *DNA Research* **23**:  
691 171-180.
- 692 **Tang H, Bomhoff MD, Briones E, Zhang L, Schnable JC, Lyons E. 2015.** SynFind: compiling  
693 syntenic regions across any set of genomes on demand. *Genome Biology and Evolution* **7**:  
694 3286-3298.
- 695 **Vallenback P, Jaarola M, Ghatnekar L, Bengtsson BO. 2008.** Origin and timing of the horizontal  
696 transfer of a *PgiC* gene from *Poa* to *Festuca ovina*. *Molecular Phylogenetics and Evolution*  
697 **46**: 890-896.
- 698 **Van Etten J, Bhattacharya D. In press.** Horizontal Gene Transfer in Eukaryotes: Not if, but How  
699 Much? *Trends in Genetics* doi:10.1016/j.tig.2020.08.006
- 700 **VanBuren R, Bryant D, Edger PP, Tang H, Burgess D, Challabathula D, Freeling M. 2015.**  
701 Single-molecule sequencing of the desiccation-tolerant grass *Oropetium thomaeum*. *Nature*  
702 **527**: 508.
- 703 **Varshney RK, Shi C, Thudi M, Mariac C, Wallace J, Qi P, ... Srivastava RK. 2017.** Pearl millet  
704 genome sequence provides a resource to improve agronomic traits in arid environments.  
705 *Nature Biotechnology* **35**: 969.
- 706 **Vogel A, Schwacke R, Denton AK, Usadel B, Hollmann J, Fischer K, ... Mayer KF. 2018.**  
707 Footprints of parasitism in the genome of the parasitic flowering plant *Cuscuta campestris*.  
708 *Nature Communications* **9**: 2515.
- 709 **Watcharamongkol T, Christin PA, Osborne CP. 2018.** C<sub>4</sub> photosynthesis evolved in warm  
710 climates but promoted migration to cooler ones. *Ecology Letters* **21**: 376-383.
- 711 **Wickell DA, Li F-W. 2019.** On the evolutionary significance of horizontal gene transfer in plants.  
712 *New Phytologist* **225**: 113-117.

- 713 **Xi Z, Bradley RK, Wurdack KJ, Wong KM, Sugumaran M, Bomblies K, ... Davis CC. 2012.**  
714 Horizontal transfer of expressed genes in a parasitic flowering plant. *BMC Genomics* **13**: 227.
- 715 **Yang Z, Wafula EK, Kim G, Shahid S, McNeal JR, Ralph PE, ... Person TN. 2019.** Convergent  
716 horizontal gene transfer and cross-talk of mobile nucleic acids in parasitic plants. *Nature*  
717 *Plants* **5**: 991-1001.
- 718 **Yoshida S, Maruyama S, Nozaki H, Shirasu K. 2010.** Horizontal gene transfer by the parasitic  
719 plant *Striga hermonthica*. *Science* **328**:1128-1128.
- 720 **Yu L, Boström C, Franzenburg S, Bayer T, Dagan T, Reusch TB. 2020.** Somatic genetic drift  
721 and multilevel selection in a clonal seagrass. *Nature Ecology & Evolution* 1-11.
- 722 **Yue J, Hu X, Sun H, Yang Y, Huang J. 2012.** Widespread impact of horizontal gene transfer on  
723 plant colonization of land. *Nature Communications* **3**: 1-9.
- 724 **Zhang J, Fu XX, Li RQ, Zhao X, Liu Y, Li MH, Zwaenepoel A, Ma H, Goffinet B, Guan YL,**  
725 **Xue JY. 2020.** The hornwort genome and early land plant evolution. *Nature plants* **6**:107-18.
- 726
- 727
- 728
- 729
- 730
- 731
- 732
- 733
- 734

735 **Tables**

736 **Table 1: Model species used in this study and associated traits.**

| Clade         | Species                                         | Ploid. | 1C    | #Genes tested | Cult. | LH | Clim. | Phot.          | Cont. | Rhiz. |
|---------------|-------------------------------------------------|--------|-------|---------------|-------|----|-------|----------------|-------|-------|
| Pooideae      | <i>Brachypodium distachyon</i> <sup>1</sup>     | 2n     | 0.31  | 17204         | N     | A  | Temp  | C <sub>3</sub> | 6     | N     |
| Pooideae      | <i>Hordeum vulgare</i> <sup>2</sup>             | 2n     | 5.39  | 16192         | Y     | A  | Temp  | C <sub>3</sub> | 6     | N     |
| Pooideae      | <i>Triticum aestivum</i> <sup>3</sup>           | 6n     | 16.95 | 56619         | Y     | A  | Temp  | C <sub>3</sub> | 6     | N     |
| Oryzoideae    | <i>Oryza sativa</i> <sup>4</sup>                | 2n     | 0.49  | 19259         | Y     | A  | Trop  | C <sub>3</sub> | 6     | N     |
| Oryzoideae    | <i>Leersia perrieri</i> <sup>5</sup>            | 2n     | 0.32  | 15777         | N     | A  | Trop  | C <sub>3</sub> | 1     | N     |
| Chloridoideae | <i>Eragrostis tef</i> <sup>6</sup>              | 4n     | 0.69  | 30605         | Y     | A  | Temp  | C <sub>4</sub> | 5     | N     |
| Chloridoideae | <i>Oropetium thomaeum</i> <sup>7</sup>          | 2n     | 0.29  | 15168         | N     | A  | Temp  | C <sub>4</sub> | 2     | N     |
| Chloridoideae | <i>Zoysia japonica</i> <sup>8</sup>             | 4n     | 0.42  | 20416         | Y     | P  | Temp  | C <sub>4</sub> | 1     | Y     |
| Andropogoneae | <i>Sorghum bicolor</i> <sup>9</sup>             | 2n     | 0.69  | 21962         | Y     | A  | Temp  | C <sub>4</sub> | 6     | N     |
| Andropogoneae | <i>Zea mays</i> <sup>10</sup>                   | 2n     | 2.65  | 25866         | Y     | A  | Temp  | C <sub>4</sub> | 6     | N     |
| Paniceae      | <i>Alloteropsis semialata</i> <sup>11</sup>     | 2n     | 1.10  | 23071         | N     | P  | Trop  | C <sub>4</sub> | 3     | Y     |
| Paniceae      | <i>Cenchrus americanus</i> <sup>12</sup>        | 2n     | 2.65  | 20159         | Y     | A  | Temp  | C <sub>4</sub> | 4     | N     |
| Paniceae      | <i>Dichanthelium oligosanthes</i> <sup>13</sup> | 2n     | 0.96  | 17761         | N     | P  | Cold  | C <sub>3</sub> | 1     | N     |
| Paniceae      | <i>Echinochloa crus-galli</i> <sup>14</sup>     | 6n     | 1.37  | 54181         | N     | A  | Temp  | C <sub>4</sub> | 6     | N     |
| Paniceae      | <i>Panicum hallii</i> <sup>15</sup>             | 2n     | 0.55  | 30255         | N     | P  | Temp  | C <sub>4</sub> | 1     | N     |
| Paniceae      | <i>Panicum virgatum</i> <sup>16</sup>           | 4n     | 1.89  | 45043         | Y     | P  | Cold  | C <sub>4</sub> | 3     | Y     |
| Paniceae      | <i>Setaria italica</i> <sup>17</sup>            | 2n     | 0.49  | 27465         | Y     | A  | Temp  | C <sub>4</sub> | 6     | N     |

737

738 Ploid. = Ploidy; 1C = 1C genome size in Gb; Cult. = cultivated (Y = yes; N = no); LH = life history  
 739 (A = annual; P = perennial); Clim. = climate (Temp = temperate; Trop = tropical); Phot. =  
 740 photosynthetic type; Cont. = number of continents; Rhiz. = rhizomatous (Y = yes; N = no).

741 <sup>1</sup>International Brachypodium Initiative, 2010; <sup>2</sup>International Barley Genome Sequencing  
 742 Consortium, 2012; <sup>3</sup>International Wheat Genome Sequencing Consortium, 2014; <sup>4</sup>Goff *et al.*,  
 743 2002; <sup>5</sup>Stein *et al.*, 2018; <sup>6</sup>Cannarozzi *et al.*, 2014; <sup>7</sup>VanBuren *et al.*, 2015; <sup>8</sup>Tanaka *et al.*, 2016;  
 744 <sup>9</sup>Patterson *et al.*, 2009; <sup>10</sup>Schnable *et al.*, 2009; <sup>11</sup>Dunning *et al.*, 2019; <sup>12</sup>Varshney *et al.*, 2017;  
 745 <sup>3</sup>Studer *et al.*, 2016; <sup>14</sup>Guo *et al.*, 2017; <sup>15</sup>Lovell *et al.*, 2018; <sup>16</sup>*Panicum virgatum* v4.1, DOE-JGI,  
 746 <http://phytozome.jgi.doe.gov/>; <sup>17</sup>Bennetzen *et al.*, 2012

747

748 **Table 2: Number of lateral gene transfers (LGT) detected between the five clades.**

| Clade         | Species                           | # LGT | Donor clade |      |        |        |      |
|---------------|-----------------------------------|-------|-------------|------|--------|--------|------|
|               |                                   |       | Pooid.      | Ory. | Chlor. | Andro. | Pan. |
| Pooideae      | <i>Brachypodium distachyon</i>    | 4     | -           | 0    | 0      | 4      | 0    |
| Pooideae      | <i>Hordeum vulgare</i>            | 0     | -           | 0    | 0      | 0      | 0    |
| Pooideae      | <i>Triticum aestivum</i>          | 8(10) | -           | 0    | 5      | 0(2)   | 3    |
| Oryzeae       | <i>Oryza sativa</i>               | 0     | 0           | -    | 0      | 0      | 0    |
| Oryzeae       | <i>Leersia perrieri</i>           | 1(4)  | 0           | -    | 0      | 1      | 0(3) |
| Chloridoideae | <i>Eragrostis tef</i>             | 1(9)  | 0           | 0    | -      | 0      | 1(9) |
| Chloridoideae | <i>Oropetium thomaeum</i>         | 0     | 0           | 0    | -      | 0      | 0    |
| Chloridoideae | <i>Zoysia japonica</i>            | 0     | 0           | 0    | -      | 0      | 0    |
| Andropogoneae | <i>Sorghum bicolor</i>            | 2(3)  | 0           | 0    | 0      | -      | 2(3) |
| Andropogoneae | <i>Zea mays</i>                   | 11    | 0           | 0    | 2      | -      | 9    |
| Paniceae      | <i>Alloteropsis semialata</i>     | 20    | 0           | 0    | 4      | 16     | -    |
| Paniceae      | <i>Cenchrus americanus</i>        | 15    | 0           | 0    | 5      | 10     | -    |
| Paniceae      | <i>Dichanthelium oligosanthes</i> | 4     | 4           | 0    | 0      | 0      | -    |
| Paniceae      | <i>Echinochloa crus-galli</i>     | 10    | 0           | 0    | 3      | 7      | -    |
| Paniceae      | <i>Panicum hallii</i>             | 8     | 0           | 0    | 6      | 2      | -    |
| Paniceae      | <i>Panicum virgatum</i>           | 30    | 0           | 0    | 1      | 29     | -    |
| Paniceae      | <i>Setaria italica</i>            | 7     | 0           | 0    | 0      | 7      | -    |

749

750 The numbers in parentheses include genes for which approximate unbiased (AU) topology tests  
751 could not be performed as no native copy from the same clade was present to constrain the tree  
752 topology. Pooid. = Pooideae; Ory. = Oryzoideae; Chlor. = Chloridoideae; Andro. = Andropogoneae;  
753 Pan. = Paniceae.

754

755

756

757

758

759

760



761 **Table 3: Number of lateral gene transfers (LGT) detected in Paniceae.**

| <b>Subgroup</b> | <b>Species</b>                    | <b>#<br/>LGT</b> | <b>Pooid.<br/>(3,698 sp.)</b> | <b>Ory.<br/>(115 sp.)</b> | <b>Chlor.<br/>(1,602 sp.)</b> | <b>Andro.<br/>(1,202 sp.)</b> | <b>Cench.<br/>(287 sp.)</b> | <b>Pani.<br/>(157 sp.)</b> |
|-----------------|-----------------------------------|------------------|-------------------------------|---------------------------|-------------------------------|-------------------------------|-----------------------------|----------------------------|
| Cenchrinae      | <i>Cenchrus americanus</i>        | 16               | 0                             | 0                         | 5                             | 10                            | -                           | 1                          |
| Cenchrinae      | <i>Setaria italica</i>            | 7                | 0                             | 0                         | 0                             | 7                             | -                           | 0                          |
| Panicinae       | <i>Panicum hallii</i>             | 8                | 0                             | 0                         | 6                             | 2                             | 0                           | -                          |
| Panicinae       | <i>Panicum virgatum</i>           | 36               | 0                             | 0                         | 1                             | 29                            | 6                           | -                          |
| Other           | <i>Alloteropsis semialata</i>     | 33(34)           | 0                             | 0                         | 4                             | 16                            | 13(14)                      | 0                          |
| Other           | <i>Dichanthelium oligosanthes</i> | 5                | 4                             | 0                         | 0                             | 0                             | 1                           | 0                          |
| Other           | <i>Echinochloa crus-galli</i>     | 23               | 0                             | 0                         | 3                             | 7                             | 8                           | 5                          |

762

763 The number of species in each clade is indicated in parentheses, with values from Soreng et al.,  
 764 (2015); Pooid. = Pooideae; Ory. = Oryzoideae; Chlor. = Chloridoideae; Andro. = Andropogoneae;  
 765 Cench. = Cenchrinae; Pani. = Panicinae.

766

767

768

769

770

771

772

773

774

775

776

777

778

779

780 **Figures**

781

782

783

784

785

786

787

788

789

790

791

792

793

794

795

796 **Fig 1: Distribution of lateral gene transfers among grasses.**

797 Time-calibrated phylogenetic tree of 17 model grass species used in this study (extracted from  
798 Christin et al., 2014; scale in million years - Myr). The direction of LGT between grass clades is  
799 shown with arrows whose size is proportional to the number of LGT received. The black portion of  
800 pie charts on key nodes of the phylogeny indicates the quartet support for the observed topology  
801 based on a multigene coalescence analysis (Dunning et al., 2019). The size of each pie chart is  
802 proportional to the number of species within the clade (Soreng et al., 2015). Numbers at the tips are  
803 the number of LGT detected in each genome.

804

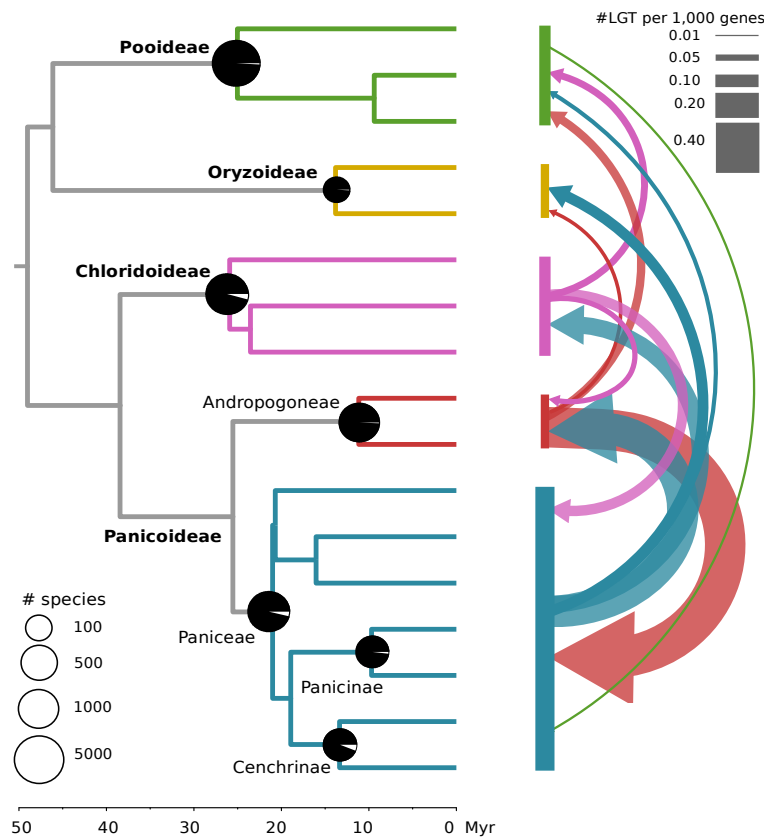

805

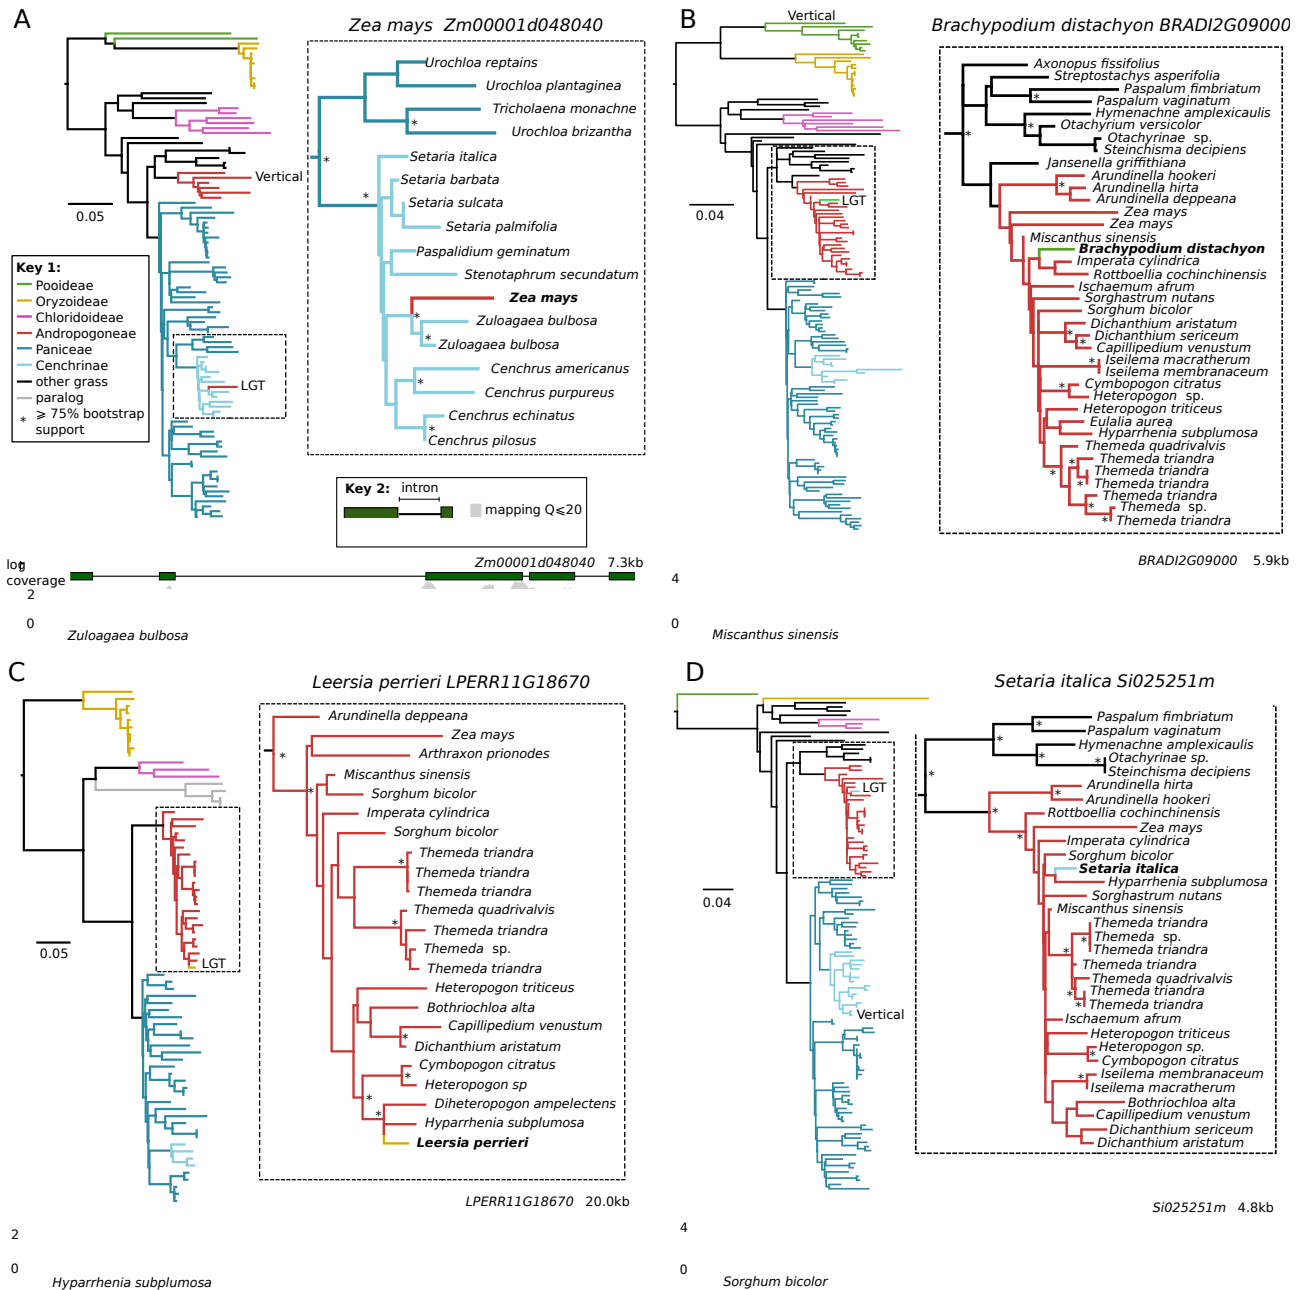

807 **Fig 2: Four examples of grass-to-grass lateral gene transfer.**

808 Each panel (A-D) shows an exemplar grass-to-grass LGT, with full and expanded regions of  
 809 maximum likelihood phylogenies shown. A coverage plot for each gene model is shown below,  
 810 generated from short-read mapping data for a species closely related to the LGT donor.

811

812

813

814

815

816

817

818

819

820

821

822

823

824

825

826

827

828

829

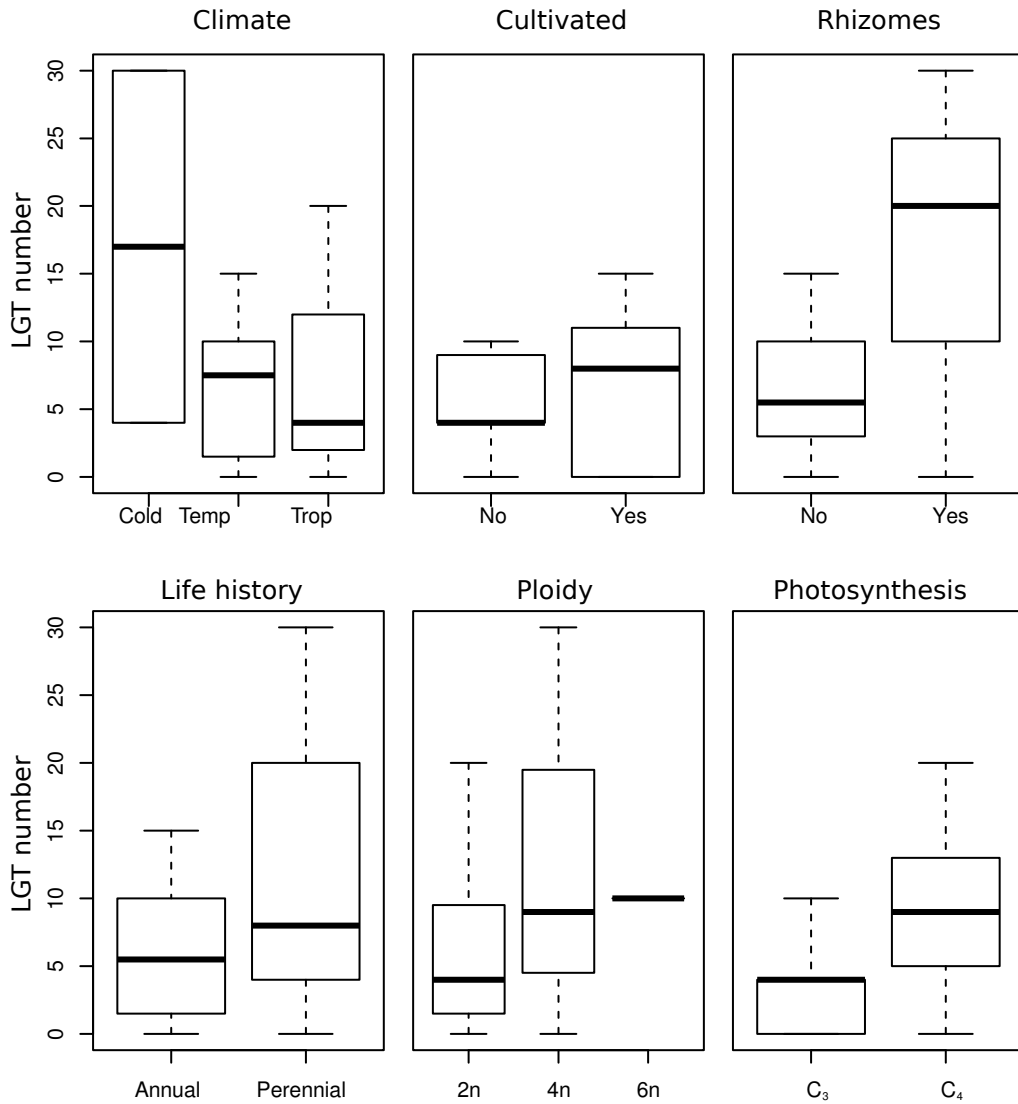

830 **Fig. 3: Numbers of lateral gene transfer (LGT) received by different categories of grasses.**

831 For each group, the distribution of LGT numbers is shown with box plots connecting the median

832 and the interquartile range, with whiskers showing 1.5 x the interquartile range.

833

834

835

836

837

838

839

840

841

842

843

844

845

846

847

848

849

850

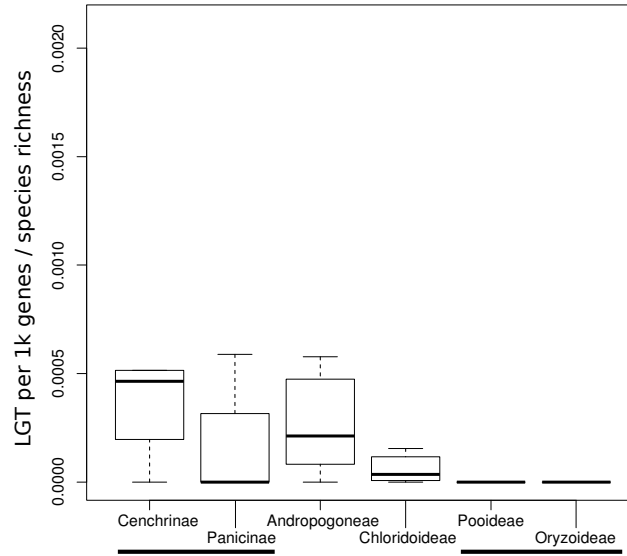

851 **Fig. 4: Number of lateral gene transfer (LGT) received by Paniceae species from different**  
852 **clades.**

853 The number of LGT in each Paniceae genome is corrected by the number of genes tested as well as  
854 the number of species in the group of donors. The phylogenetic distance increases from left to right,  
855 with equidistant clades joined by solid bars. Box plots show median, interquartile range and 1.5 x  
856 interquartile range.
